# Supplementary material for: A Small-Molecule Tankyrase Inhibitor Reduces Glioma Stem Cell Proliferation and Sphere Formation
Source: PubMed Central journal article supplement (PMC7352564; doi:10.3390/cancers12061630), 2020-06-19
Supplement: cancers-12-01630-s001.pdf [file cancers-12-01630-s001.pdf]

Supplementary Materials

# A Small-Molecule Tankyrase Inhibitor Reduces Glioma Stem Cell Proliferation and Sphere Formation

Kirsten S. Kierulf-Vieira, Cecilie Jonsgar Sandberg, Jo Waaler, Kaja Lund, Erlend Skaga, Birthe Mikkelsen Saberniak, Ioannis Panagopoulos, Petter Brandal, Stefan Krauss, Iver Arne Langmoen and Einar Osland Vik-Mo

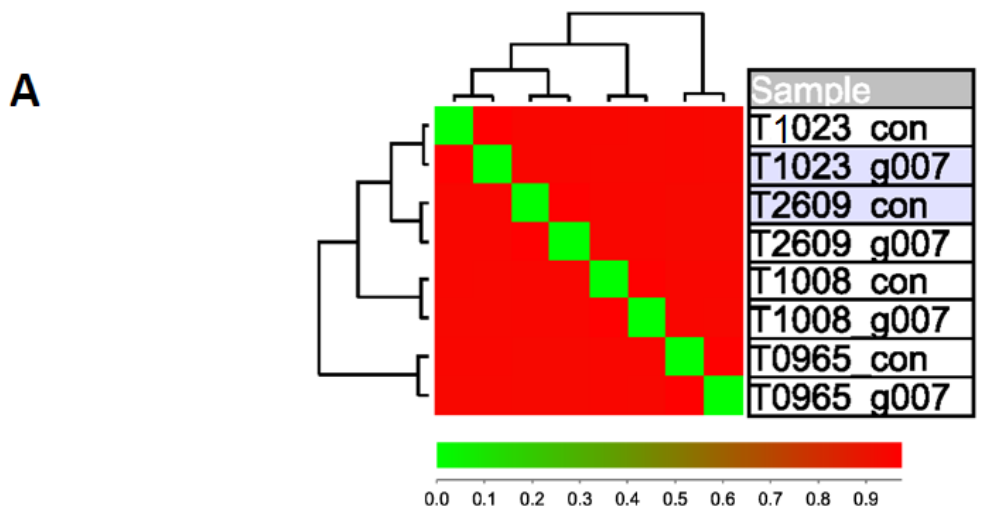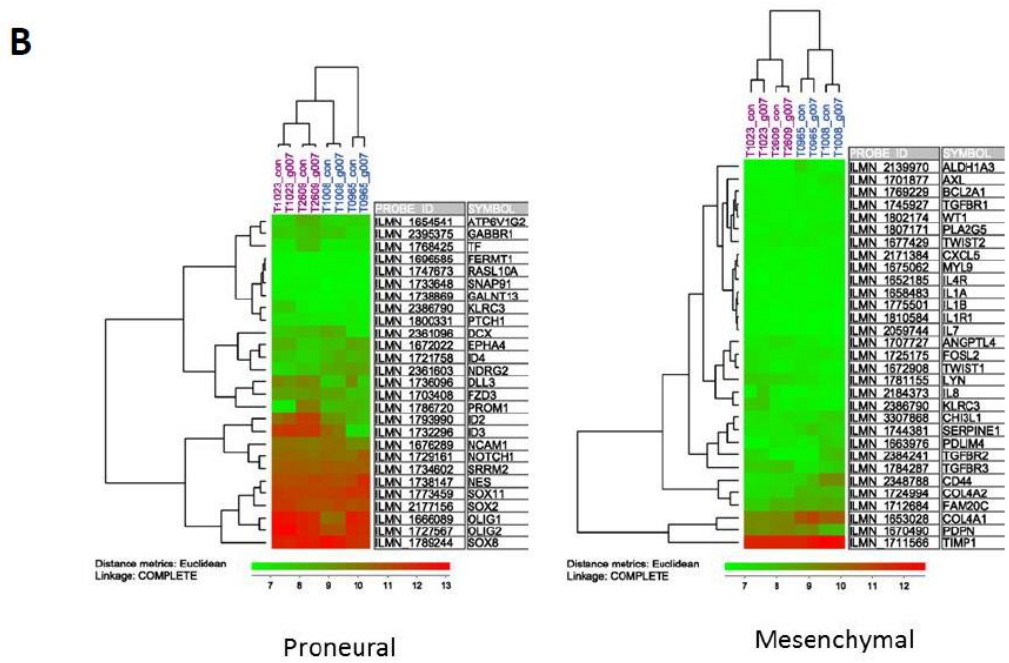

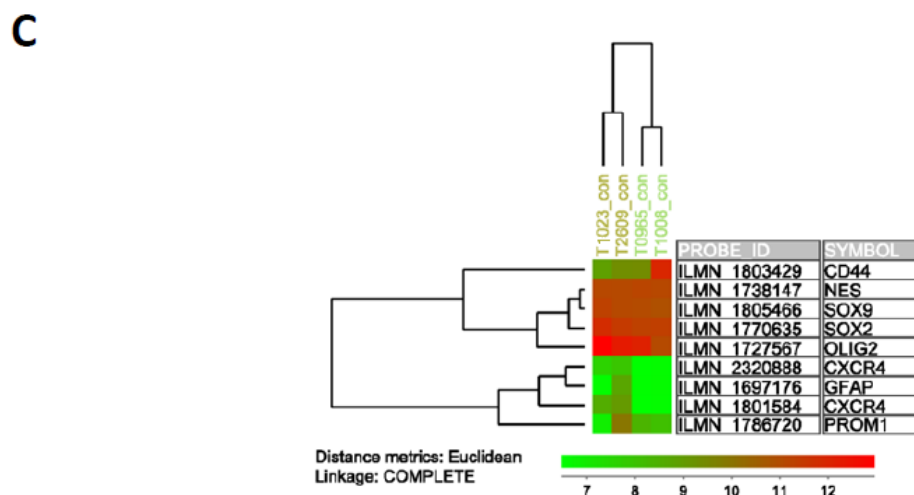

**Figure S1.** Global gene expression analysis with hierarchical clustering. (A) Unsupervised hierarchical clustering analysis of the global gene expression with distance matrix (average linkage, Pearson Correlation). (B) Unsupervised hierarchical clustering analysis of the gene expression representing the proneural and the mesenchymal subtypes of GSCs. (C) Unsupervised hierarchical clustering analysis of the gene expression representing typical GSC molecular markers.

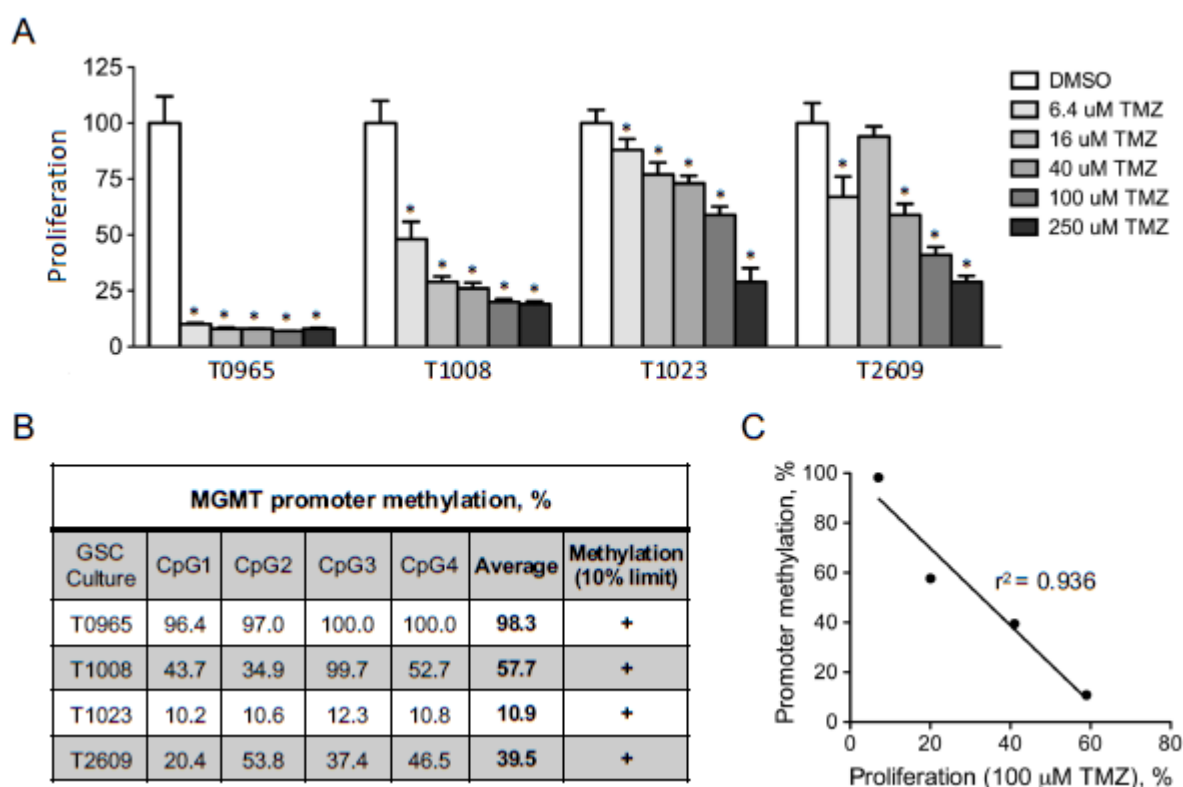

**Figure S2.** TMZ sensitivity and correlation with MGMT promoter methylation. (A) Dose-response curves for TMZ in four primary GSC cultures treated with TMZ for 14 days, presented as percentage of the DMSO control (0.5 %). Results are presented as mean  $\pm$  SD. (B) Percentage MGMT promoter methylation calculated as an average for the four CpG islands. Cultures with an average of  $\geq 10$  % were considered to be MGMT methylated. (C) Correlation of MGMT promoter methylation to anti-proliferative effect of TMZ at 100  $\mu$ M, as percentage of DMSO. \*  $p < 0.05$ .

## Cytoplasmic fraction

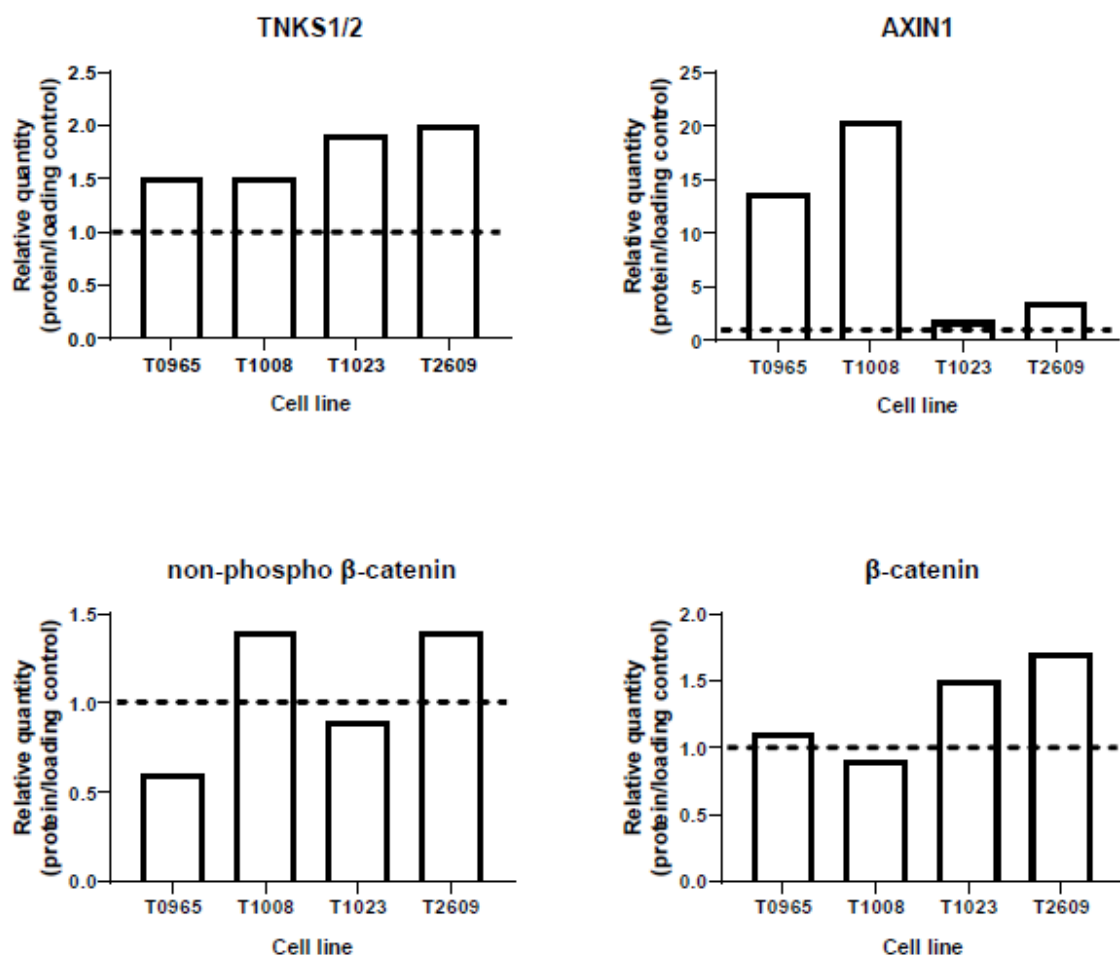

## Nuclear fraction

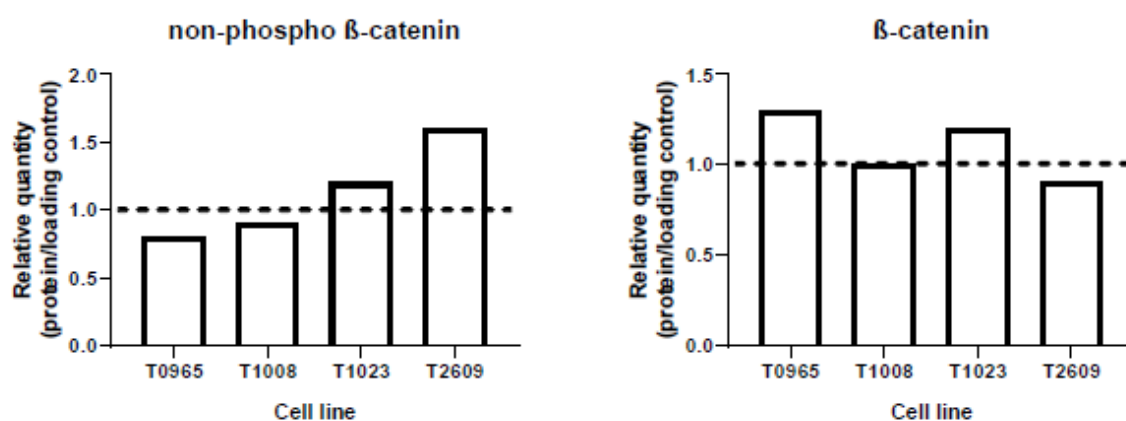

**Figure S3.** Quantified protein immunoblot ratios (protein vs. loading control) for cytoplasmic and nuclear levels for WNT/ $\beta$ -catenin signaling proteins shown in Figure 2.

## Cytoplasmic fraction

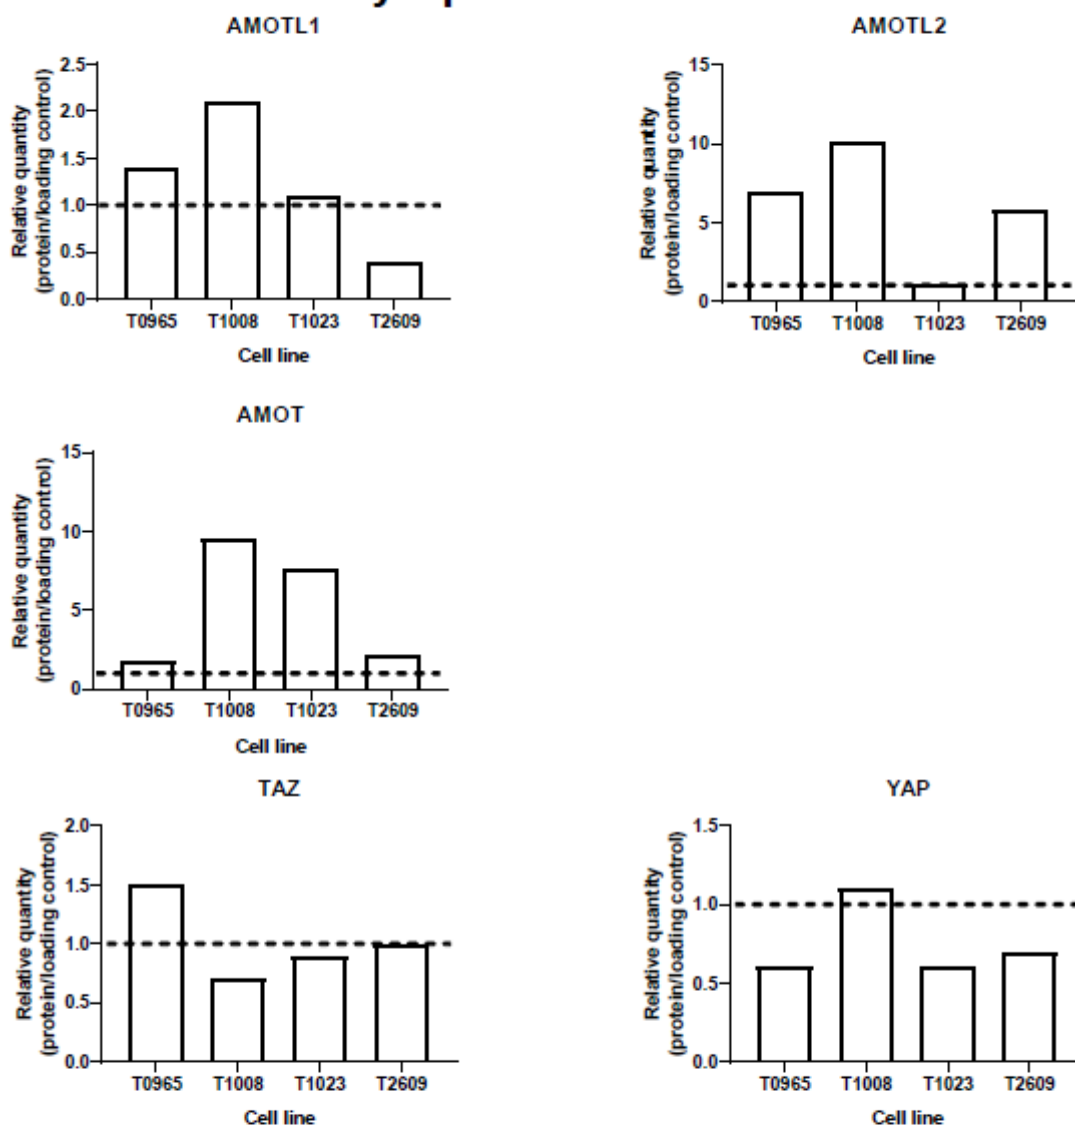

## Nuclear fraction

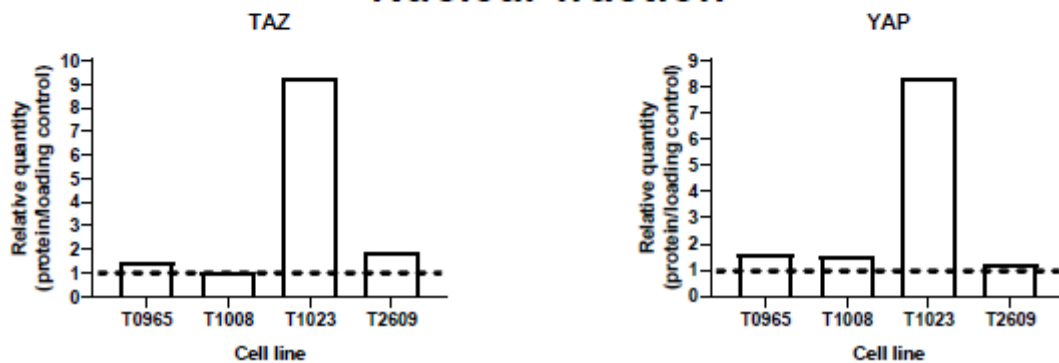

**Figure S4.** Quantified protein immunoblot ratios (protein vs. loading control) for cytoplasmic and nuclear levels for YAP/TAZ signaling proteins shown in Figure 3.

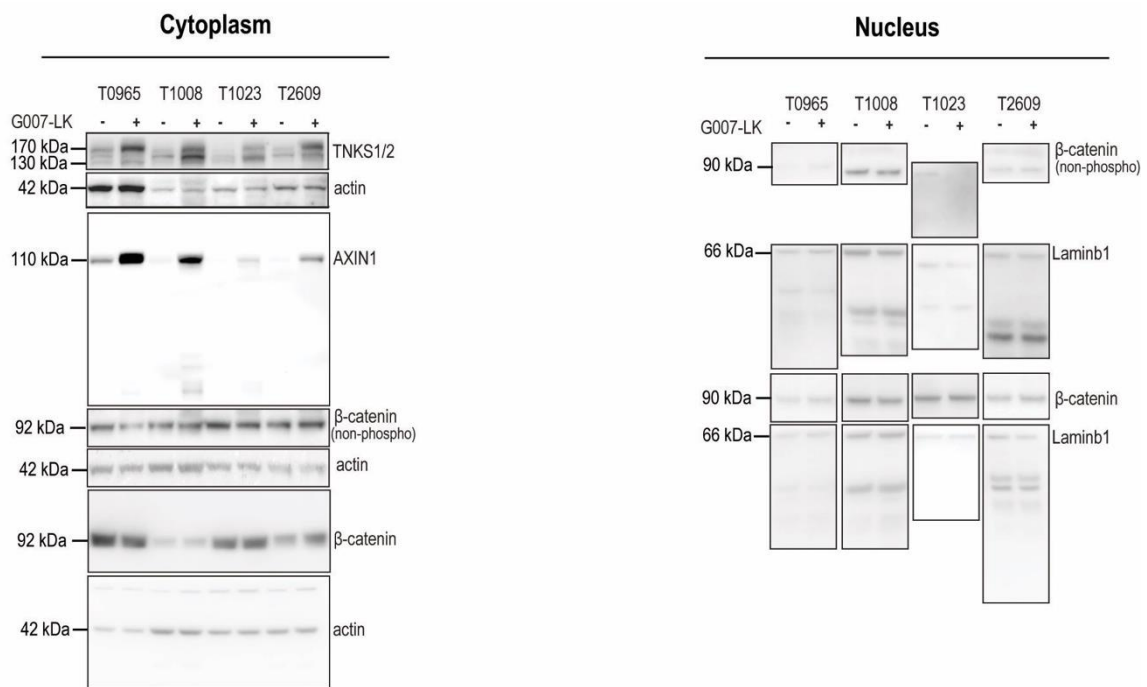

Figures S5. Detailed information about the western blot for Figure 2A.

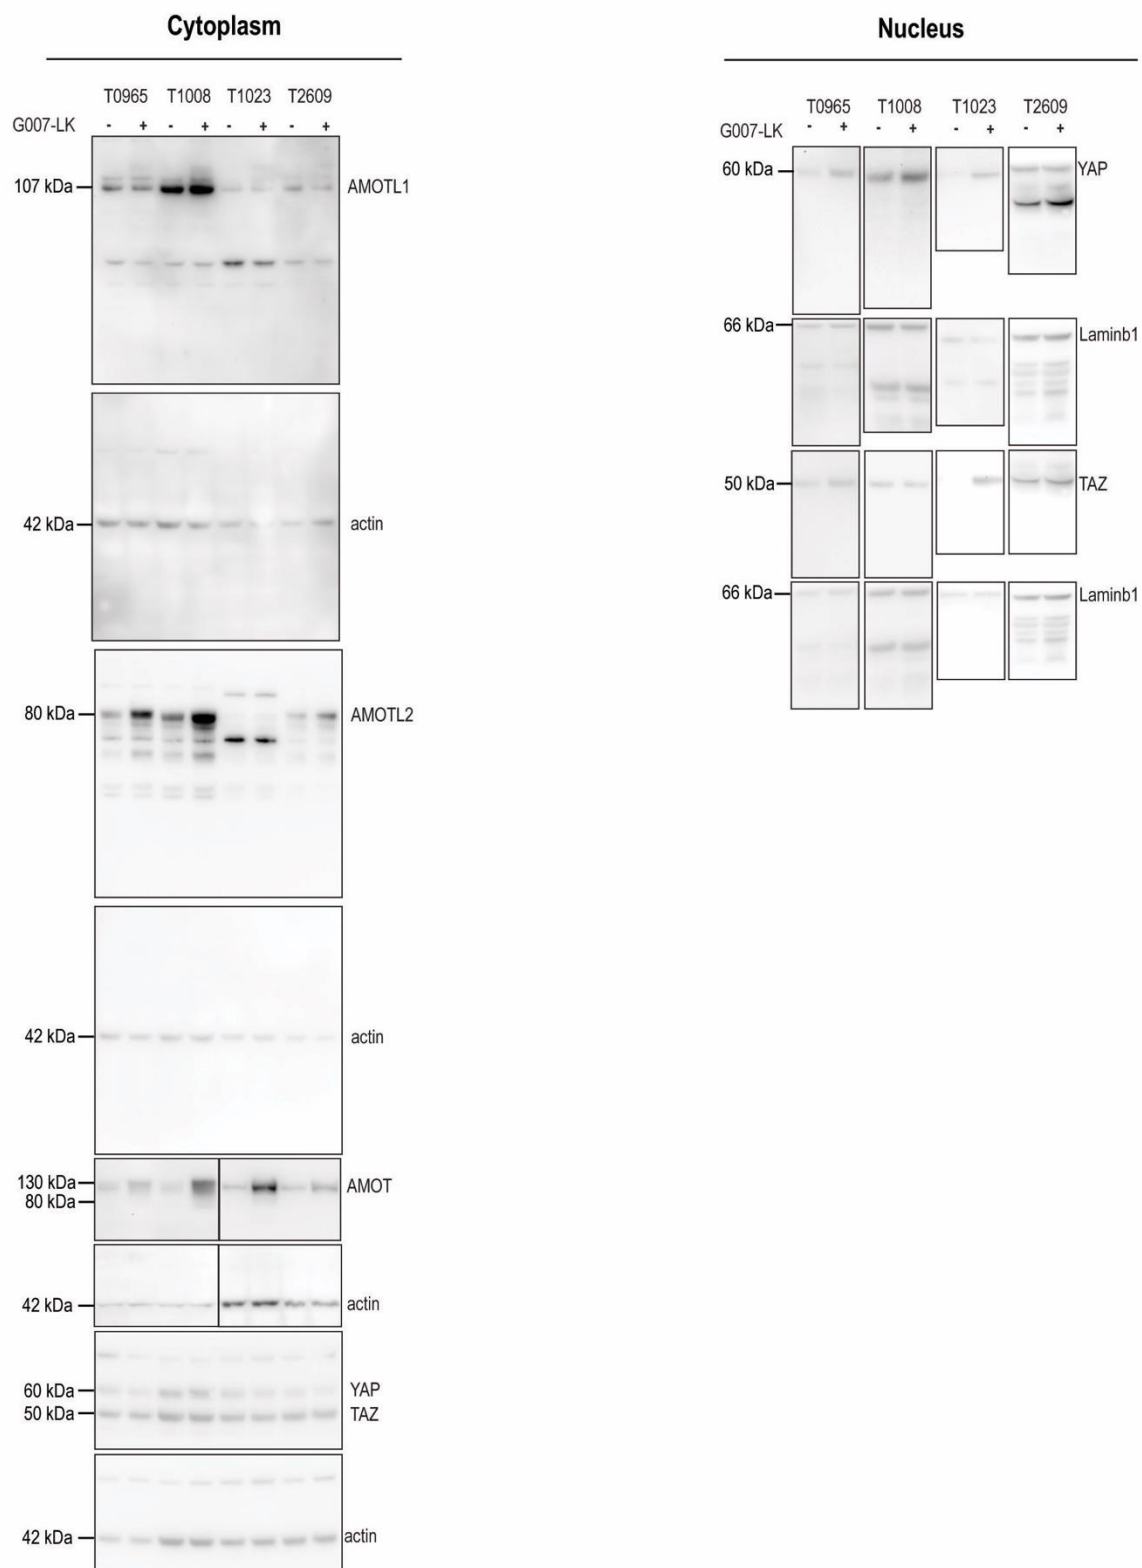

**Figures S6.** Detailed information about the western blot for Figure 3A.

**Table S1.** Unsupervised gene expression analysis of cell cultures treated with G007 (500 nM) or DMSO (0.01%).

| Probe_ID     | Symbol    | ILMN_GENE | Entrez_Gene | Fold Change Low Sensitivity/ High Sensitivity |
|--------------|-----------|-----------|-------------|-----------------------------------------------|
| ILMN_1795251 | SPARCL1   | SPARCL1   | 8404        | 15.95                                         |
| ILMN_1664861 | ID1       | ID1       | 3397        | 10.46                                         |
| ILMN_1731374 | CPE       | CPE       | 1363        | 5.83                                          |
| ILMN_1732296 | ID3       | ID3       | 3399        | 6.65                                          |
| ILMN_1696657 | LRRN2     | LRRN2     | 10446       | 5.30                                          |
| ILMN_1801584 | CXCR4     | CXCR4     | 7852        | 4.86                                          |
| ILMN_2316236 | HOPX      | HOPX      | 84525       | 4.55                                          |
| ILMN_1760849 | NETO2     | NETO2     | 81831       | 6.41                                          |
| ILMN_1688722 | IL13RA2   | IL13RA2   | 3598        | 4.70                                          |
| ILMN_1813741 | KCNJ16    | KCNJ16    | 3773        | 4.29                                          |
| ILMN_1794742 | HES5      | HES5      | 388585      | 4.29                                          |
| ILMN_1699980 | TSPAN18   | TSPAN18   | 90139       | 4.04                                          |
| ILMN_2169761 | CPNE8     | CPNE8     | 144402      | 4.51                                          |
| ILMN_1762696 | FAM181A   | FAM181A   | 90050       | 3.90                                          |
| ILMN_1798975 | EGFR      | EGFR      | 1956        | 5.82                                          |
| ILMN_1807969 | SNCAIP    | SNCAIP    | 9627        | 3.69                                          |
| ILMN_1674782 | LOC375295 | LOC375295 | 375295      | 4.17                                          |
| ILMN_1720511 | LRRN1     | LRRN1     | 57633       | 3.54                                          |
| ILMN_1781388 | PGM5      | PGM5      | 5239        | 3.72                                          |
| ILMN_1703178 | SCG2      | SCG2      | 7857        | 0.19                                          |
| ILMN_1677723 | ANGPT1    | ANGPT1    | 284         | 0.22                                          |
| ILMN_1696537 | DDIT4L    | DDIT4L    | 115265      | 0.21                                          |
| ILMN_2345142 | SULF2     | SULF2     | 55959       | 0.28                                          |
| ILMN_2336094 | ODZ3      | ODZ3      | 55714       | 0.23                                          |
| ILMN_2148527 | H19       | H19       | 283120      | 0.23                                          |
| ILMN_1674785 | COL2A1    | COL2A1    | 1280        | 0.25                                          |
| ILMN_1656111 | MYLIP     | MYLIP     | 29116       | 0.30                                          |
| ILMN_1733515 | LOXL3     | LOXL3     | 84695       | 0.26                                          |
| ILMN_1728478 | CXCL16    | CXCL16    | 58191       | 0.28                                          |
| ILMN_1797776 | PRSS23    | PRSS23    | 11098       | 0.27                                          |
| ILMN_1769282 | FRMD6     | FRMD6     | 122786      | 0.29                                          |
| ILMN_1765641 | SEMA3A    | SEMA3A    | 10371       | 0.25                                          |
| ILMN_1805665 | FLRT3     | FLRT3     | 23767       | 0.27                                          |
| ILMN_1745994 | GAS7      | GAS7      | 8522        | 0.18                                          |
| ILMN_1685608 | NPTX2     | NPTX2     | 4885        | 0.24                                          |
| ILMN_1801616 | EMP1      | EMP1      | 2012        | 0.26                                          |
| ILMN_2374449 | SPP1      | SPP1      | 6696        | 0.24                                          |
| ILMN_1784320 | ELMO1     | ELMO1     | 9844        | 0.22                                          |
| ILMN_1751276 | BDNF      | BDNF      | 627         | 0.24                                          |
| ILMN_1757497 | VEGF      | VEGF      | 7425        | 0.23                                          |
| ILMN_1766054 | ABCA1     | ABCA1     | 19          | 0.21                                          |
| ILMN_2188521 | PVRL3     | PVRL3     | 25945       | 0.18                                          |
| ILMN_1780170 | APOD      | APOD      | 347         | 0.15                                          |

**Table S2.** Results from global gene expression analysis (SAM,  $q < 10\%$ ) of GSC cultures treated with G007 (500 nM) or DMSO (0.01%).

| PROBE_ID     | SYMBOL   | ILMN_GENE | ENTREZ_GENE_ID | q-val[i] | T0836<br>DMSO | T0836<br>G007 | T0965<br>DMSO | T0965<br>G007 | T1008<br>DMSO | T1008<br>G007 | T1023<br>DMSO | T1023<br>G007 | T2609<br>DMSO | T2609<br>G007 |
|--------------|----------|-----------|----------------|----------|---------------|---------------|---------------|---------------|---------------|---------------|---------------|---------------|---------------|---------------|
| ILMN_1694268 | HES6     | HES6      | 55502          | 0        | 12.45         | 11.88         | 11.72         | 10.85         | 11.73         | 11.17         | 12.11         | 11.52         | 12.07         | 11.63         |
| ILMN_1752394 | CCNB1IP1 | CCNB1IP1  | 57820          | 0        | 7.68          | 7.06          | 9.22          | 8.80          | 8.83          | 8.54          | 8.48          | 8.07          | 9.17          | 8.68          |
| ILMN_1766446 | C6orf48  | C6ORF48   | 50854          | 0        | 7.80          | 7.28          | 8.07          | 7.56          | 7.90          | 7.61          | 7.94          | 7.47          | 7.76          | 7.43          |
| ILMN_2387990 | UBE2J2   | UBE2J2    | 118424         | 0        | 7.59          | 7.30          | 8.11          | 7.72          | 7.96          | 7.61          | 8.07          | 7.77          | 8.04          | 7.80          |
| ILMN_2347349 | CCNB1IP1 | CCNB1IP1  | 57820          | 0        | 8.26          | 7.64          | 10.04         | 9.68          | 9.73          | 9.36          | 9.30          | 8.89          | 9.94          | 9.61          |
| ILMN_3227023 | SNHG7    | SNHG7     | 84973          | 0        | 9.21          | 8.91          | 10.74         | 10.15         | 9.67          | 9.40          | 9.59          | 9.06          | 10.02         | 9.63          |
| ILMN_1707631 | MED10    | MED10     | 84246          | 8.69     | 9.59          | 9.26          | 9.52          | 9.29          | 9.84          | 9.55          | 9.95          | 9.40          | 9.65          | 9.24          |
| ILMN_2403237 | CHN2     | CHN2      | 1124           | 8.69     | 8.07          | 7.81          | 7.61          | 7.41          | 8.09          | 7.83          | 7.79          | 7.49          | 7.26          | 7.08          |
| ILMN_1726986 | AADAT    | AADAT     | 51166          | 8.69     | 8.93          | 8.66          | 8.96          | 8.70          | 9.27          | 8.93          | 8.90          | 8.70          | 8.85          | 8.65          |
| ILMN_2391765 | C6orf48  | C6ORF48   | 50854          | 8.69     | 11.82         | 11.69         | 12.25         | 11.67         | 12.10         | 11.60         | 12.06         | 11.38         | 11.79         | 11.04         |
| ILMN_1664698 | UNC119   | UNC119    | 9094           | 8.69     | 8.04          | 7.73          | 7.88          | 7.71          | 8.31          | 7.83          | 8.37          | 7.91          | 8.11          | 7.77          |
| ILMN_1794742 | HES5     | HES5      | 388585         | 7.97     | 9.61          | 10.07         | 6.77          | 8.19          | 6.80          | 7.38          | 8.20          | 8.66          | 9.57          | 10.28         |



**Table S3.** IDH methylation status for the four patient-derived glioblastomas.

| <b>GSC Culture</b> | <b>IDH1 Forward</b> | <b>IDH1 Reverse</b> | <b>Type Mutation</b> | <b>IDH2 Forward</b> | <b>IDH2 Reverse</b> | <b>Type Mutation</b> |
|--------------------|---------------------|---------------------|----------------------|---------------------|---------------------|----------------------|
| T0965              | CGT                 |                     | -                    | AGG                 |                     | -                    |
| T1008              | CGT                 |                     | -                    | AGG                 |                     | -                    |
| T1023              | CGT                 |                     | -                    | AGG                 |                     | -                    |
| T2609              | CGT                 |                     | -                    | AGG                 |                     | -                    |

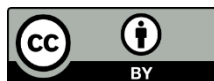

© 2020 by the authors. Licensee MDPI, Basel, Switzerland. This article is an open access article distributed under the terms and conditions of the Creative Commons Attribution (CC BY) license (<http://creativecommons.org/licenses/by/4.0/>).
